# Supplementary material for: Electrocardiography Assessment of Sympatico–Vagal Balance during Resting and Pain Using the Texas Instruments ADS1299
Source: MDPI journal article supplement (doi:10.3390/bioengineering10020205), 2023-02-03
Supplement: s1 [file s1]

# Supplementary materials

**Table S1. The ECG-based individual cardiac function biomarkers in resting and cold pressor conditions**

| Resting                                                                                 |        |             |        |                    |                    |       |       |          | Cold pressor |        |                    |                    |       |       |          |           |
|-----------------------------------------------------------------------------------------|--------|-------------|--------|--------------------|--------------------|-------|-------|----------|--------------|--------|--------------------|--------------------|-------|-------|----------|-----------|
| ID                                                                                      |        | RR-interval | HR     | LF                 | HF                 | LF/HF | DC    | PRD      | RR-interval  | HR     | LF                 | HF                 | LF/HF | DC    | PRD      | Endurance |
| number                                                                                  |        | (ms)        | (bpm)  | (ms <sup>2</sup> ) | (ms <sup>2</sup> ) |       | (ms)  | (degree) | (ms)         | (bpm)  | (ms <sup>2</sup> ) | (ms <sup>2</sup> ) |       | (ms)  | (degree) | time (s)  |
| RR-<br>interval<br>in rest<br>state ><br>RR-<br>interval<br>in cold<br>pressor<br>state | ID1009 | 746.09      | 80.62  | 619.82             | 334.25             | 1.85  | 10.07 | 0.44     | 696.17       | 86.52  | 40.61              | 392.22             | 0.10  | 9.51  | 0.39     | 27        |
|                                                                                         | ID1010 | 915.68      | 65.68  | 301.36             | 1353.77            | 0.22  | 18.81 | 0.36     | 823.80       | 73.10  | 364.79             | 852.90             | 0.43  | 16.13 | 0.45     | 122       |
|                                                                                         | ID1002 | 787.99      | 76.25  | 169.77             | 101.30             | 1.68  | 6.26  | 0.35     | 783.71       | 76.88  | 401.34             | 99.11              | 4.05  | 7.30  | 0.44     | 119       |
|                                                                                         | ID1004 | 796.25      | 75.65  | 1200.43            | 356.03             | 3.37  | 13.93 | 0.40     | 738.08       | 81.64  | 8.87               | 382.75             | 0.02  | 11.46 | 0.50     | 43        |
|                                                                                         | ID1005 | 812.55      | 74.05  | 540.39             | 879.08             | 0.61  | 18.01 | 0.39     | 741.97       | 81.34  | 1127.28            | 422.30             | 2.67  | 16.16 | 0.52     | 78        |
|                                                                                         | ID1007 | 780.43      | 76.99  | 241.20             | 221.42             | 1.09  | 7.90  | 0.36     | 757.20       | 79.42  | 471.11             | 332.51             | 1.42  | 9.71  | 0.29     | 96        |
|                                                                                         | ID1008 | 670.35      | 89.90  | 272.14             | 677.09             | 0.40  | 8.66  | 0.44     |              |        |                    |                    |       |       |          |           |
|                                                                                         | ID1006 | 826.01      | 73.11  | 1482.27            | 1539.94            | 0.96  | 22.08 | 0.44     | 764.71       | 78.96  | 820.36             | 746.12             | 1.10  | 15.67 | 0.42     | 121       |
|                                                                                         | ID2003 | 744.04      | 80.82  | 578.80             | 270.01             | 2.14  | 10.85 | 0.46     | 697.70       | 86.31  | 3.77               | 45.94              | 0.08  | 11.08 | 0.63     | 20        |
|                                                                                         | ID2007 | 864.04      | 69.88  | 1183.15            | 1324.69            | 0.89  | 23.47 | 0.35     | 831.08       | 72.91  | 1662.22            | 1991.42            | 0.83  | 28.12 | 0.41     | 100       |
|                                                                                         | Mean   | 794.34      | 76.30  | 658.93             | 705.76             | 1.32  | 14.00 | 0.40     | 759.38       | 79.68  | 544.48             | 585.03             | 1.19  | 13.90 | 0.45     | 80.3      |
| S.E.                                                                                    | 20.34  | 1.99        | 139.97 | 160.62             | 0.29               | 1.86  | 0.01  | 14.33    | 1.47         | 168.54 | 175.46             | 0.41               | 1.86  | 0.03  | 11.6     |           |
| p-value                                                                                 | 0.001  | 0.000       | 0.462  | 0.410              | 0.717              | 0.529 | 0.081 |          |              |        |                    |                    |       |       |          |           |
| RR-<br>interval<br>in rest<br>state<<br>RR-<br>interval<br>in cold<br>pressor<br>state  | ID2004 | 856.18      | 70.29  | 536.58             | 113.09             | 4.74  | 7.47  | 0.40     | 879.89       | 68.91  | 251.76             | 747.42             | 0.34  | 14.48 | 0.40     | 44        |
|                                                                                         | ID2006 | 788.17      | 76.48  | 544.09             | 1065.96            | 0.51  | 17.55 | 0.27     | 880.90       | 68.56  | 1745.91            | 2077.74            | 0.84  | 26.16 | 0.43     | 122       |
|                                                                                         | ID2005 | 776.39      | 77.60  | 793.05             | 638.74             | 1.24  | 15.08 | 0.31     | 802.69       | 75.23  | 1823.42            | 967.23             | 1.89  | 20.72 | 0.30     | 130       |
|                                                                                         | ID2008 | 784.62      | 76.90  | 488.48             | 474.19             | 1.03  | 13.31 | 0.31     | 824.54       | 73.05  | 853.88             | 644.44             | 1.32  | 15.84 | 0.37     | 132       |
|                                                                                         | ID2009 | 827.67      | 72.84  | 764.89             | 1140.31            | 0.67  | 19.58 | 0.38     | 857.01       | 70.44  | 830.66             | 2182.89            | 0.38  | 24.79 | 0.35     | 113       |
|                                                                                         | ID1003 | 822.89      | 73.08  | 341.59             | 284.42             | 1.20  | 8.86  | 0.42     | 857.27       | 70.08  | 12.13              | 134.61             | 0.09  | 5.88  | 0.45     | 32        |
|                                                                                         | ID1011 | 801.02      | 75.68  | 2282.65            | 1336.41            | 1.71  | 20.73 | 0.30     | 848.86       | 71.27  | 2638.33            | 2283.76            | 1.16  | 25.80 | 0.39     | 131       |
|                                                                                         | Mean   | 808.13      | 74.70  | 821.62             | 721.87             | 1.59  | 14.65 | 0.34     | 850.17       | 71.08  | 1165.16            | 1291.16            | 0.86  | 19.10 | 0.38     | 100.5     |
|                                                                                         | S.E.   | 10.02       | 0.94   | 232.04             | 162.97             | 0.51  | 1.79  | 0.02     | 9.94         | 0.83   | 329.30             | 304.91             | 0.22  | 2.62  | 0.02     | 12.7      |
| p-value                                                                                 | 0.003  | 0.004       | 0.178  | 0.018              | 0.309              | 0.021 | 0.138 |          |              |        |                    |                    |       |       |          |           |

Notes: S.E., Standard error, p-value, results of the paired student t-test between resting and cold pressor conditions.

HR: Heartbeat rate; LF: Low-frequency power (0.04-0.15 Hz); HF: high-frequency power (0.15-0.4 Hz); DC: Deceleration capacity of heart rate; PRD: Periodic repolarization dynamics. ID1XXX: ID number of the participants from the Asian Institute of Gastroenterology, Hyderabad, and ID2XXX: ID number of the participants from the All India Institute of Medical Sciences, New Delhi.
